# Supplementary material
Source: PubMed Central journal article supplement (PMC4019010)
Supplement: NIHMS578933-supplement-Supplementary_1.pdf [file NIHMS578933-supplement-Supplementary_1.pdf]

1 | **Online-only Material**

2  
3  
4  
5  
6  
7  
8  
9  
10  
11  
12  
13  
14

**eTable 1: Demographic characteristics of CHARGE subjects (N=524).**

**eFigure 1a: Distribution of traffic related air pollution (TRP) estimates for the first year of life, pregnancy, and each trimester\*. \*Mean and (standard deviation (SD)) for each time point are included as text.**

**eFigure 1b: Distribution of regional pollutant measures for the first year of life, pregnancy, and each trimester\*. \*Mean and (standard deviation (SD)) for each time point are included as text.**  
**PM<sub>2.5</sub>** = particulate matter < 2.5µm aerodynamic diameter, **PM<sub>10</sub>** = particulate matter < 10µm aerodynamic diameter, **ppb** = parts per billion

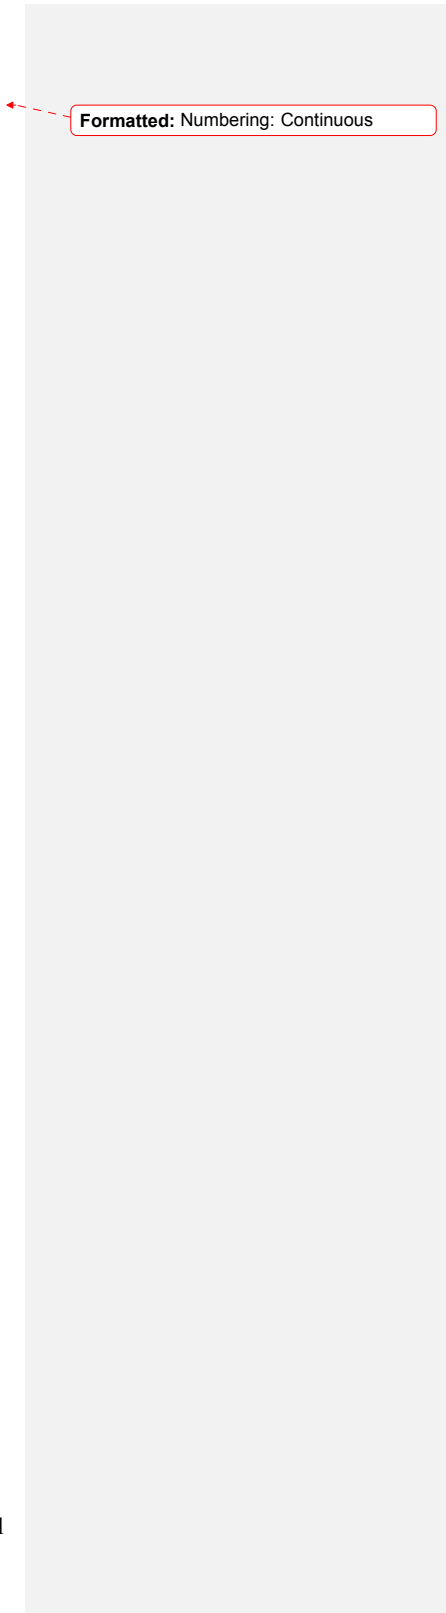

Formatted: Numbering: Continuous

15

**eTable 1: Demographic characteristics of CHARGE subjects (N=524).**

|                                            | <b>Cases<br/>N=279</b> | <b>Controls<br/>N=245</b> | <b>p-value</b> |
|--------------------------------------------|------------------------|---------------------------|----------------|
| <b>Male Gender</b>                         | 87%                    | 82%                       | 0.11           |
| <b>Child's Ethnicity</b>                   |                        |                           | 0.15           |
| Non-Hispanic Caucasian                     | 51%                    | 50%                       |                |
| Hispanic                                   | 30%                    | 30%                       |                |
| Non-Hispanic Black                         | 1%                     | 2%                        |                |
| Non-Hispanic Asian                         | 7%                     | 3%                        |                |
| Other*                                     | 11%                    | 16%                       |                |
| <b>Maximum Education in Home</b>           |                        |                           | 0.95           |
| High School or Less                        | 7%                     | 8%                        |                |
| Some College                               | 29%                    | 30%                       |                |
| Bachelor Degree                            | 36%                    | 37%                       |                |
| Graduate or Professional Degree            | 28%                    | 25%                       |                |
| <b>Maternal Smoking During Pregnancy**</b> | 9%                     | 7%                        | 0.37           |
| <b>Maternal Age ≥35</b>                    | 28%                    | 25%                       | 0.44           |

16

17

18

19

20

21

22

23

24

25

26

27

28

29

30

\*Other= mixed race, or other reported races including native American, Indian, East Indian, Cuban, or Mexican-American

\*\*Mother reported smoking at any time during pregnancy
