# Supplementary material
Source: PubMed Central journal article supplement (PMC4019010)

**First Year**

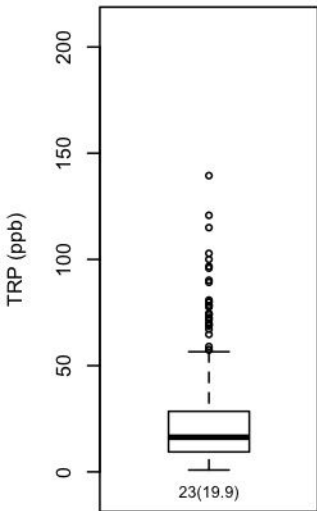

**All Pregnancy**

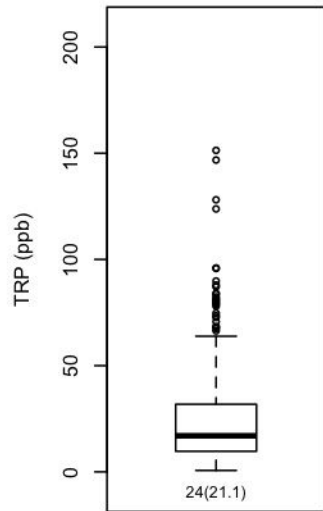

**First Trimester**

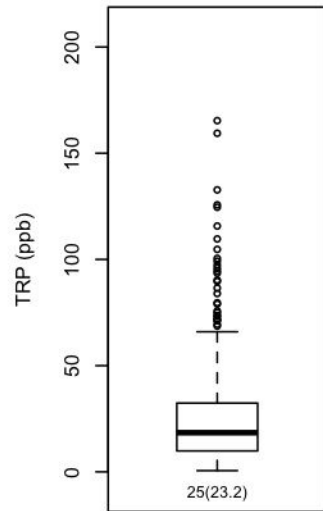

**Second Trimester**

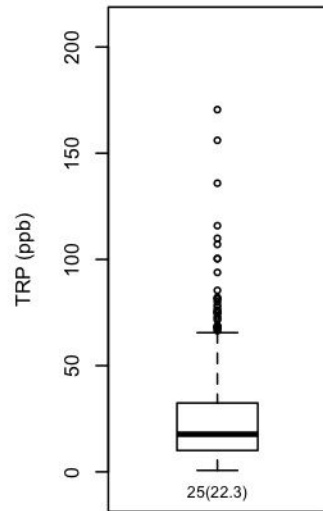

**Third Trimester**

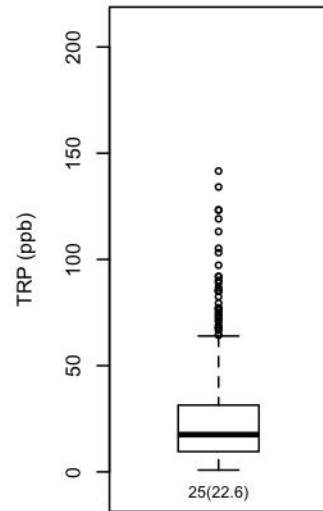

Supplement: NIHMS578933-supplement-eFigure1.pdf [file NIHMS578933-supplement-eFigure1.pdf]

### PM 2.5

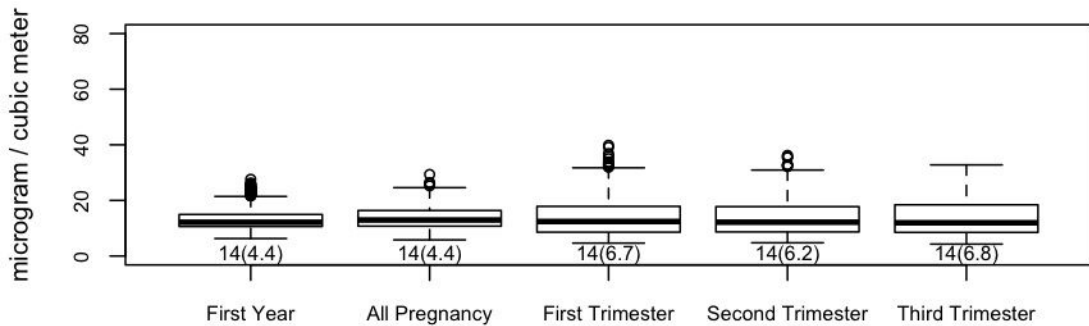

### PM 10

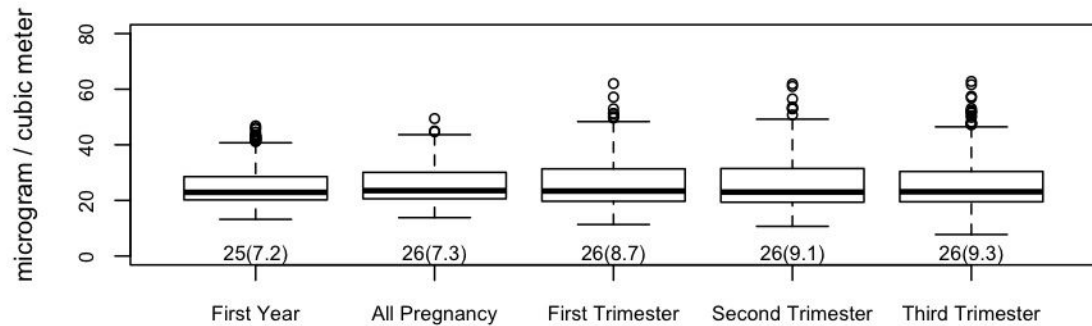

### Ozone

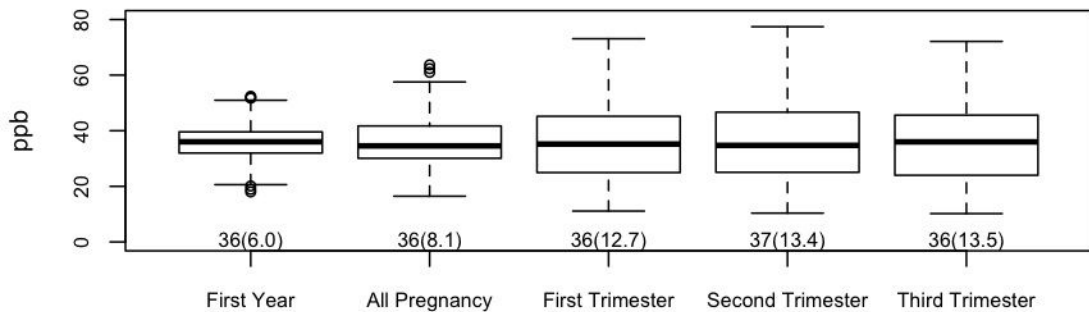

### Nitrogen Dioxide

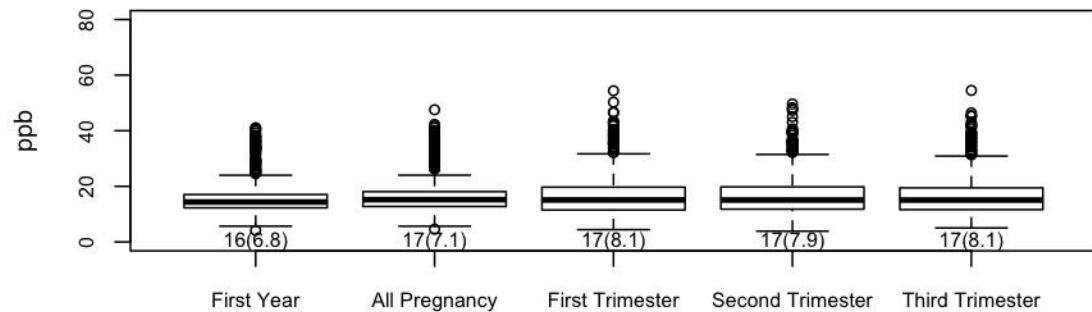

Supplement: NIHMS578933-supplement-eFigure2.pdf [file NIHMS578933-supplement-eFigure2.pdf]
